# Supplementary material for: Experience-dependent weakening of callosal synaptic connections in the absence of postsynaptic FMRP
Source: eLife. 2021 Oct 7;10:e71555. doi: 10.7554/eLife.71555 (PMC8526058; doi:10.7554/eLife.71555)
Supplement: Figure 1—source data 1. [file elife-71555-fig1-data1.xlsx]

## Sheet: Figure 1
Figure 1D							Figure 1H
	Left			Right				Right			Left	WT
	WT	Fmr1 KO		WT	Fmr1 KO			WT	Fmr1 KO		Vertical position (µm)	Cell #1	2	3	4	5	6	7	8	9	10	11	12	13	14	15	16	17	18	19	20	21	22	23	24	25	26	27	28	29	30	31	32	33	34	35	36	37	38
	192.105	97.275		2.58457	1.73273			1.19225	1.60616		248		7.3				0.93	-0.82	3.81	2.18	-0.61	3.37		2.14	2.08		3.49		0.23	1.88	13.95	6.95	0.18			-0.69	11.24		1.19	3.43		0.27					-1.14	-0.11
	124.464	69.554		1.79401	1.99722			1.61024	1.54528		223	-0.1	7.3				11.16	14.14	13.01	2.18	-0.61	20.15		8.21	2.08		3.49	-0.44	0.23	1.88	13.95	6.95	1.21		0.28	2.27	11.24	1.42	1.19	3.43		3.66		-0.1			1.04	20.71	-0.59
	99.975	77.329		1.60195	1.41122			1.59869	1.51596		198	3.79	20.86	-0.13	4.03	-1.43	11.16	14.14	13.01	19.56	7.25	20.15		8.21	4.09		11.56	4.21	1.86	6.72	9.54	9.09	1.21		1.62	2.27	14.49	27.94	2.26	24.14	0.91	3.66	-0.12	13.61	-1.37	0.74	1.04	20.71	15.38
	357.828	34.946		2.8547	0.999329			1.61178	0.508459		173	3.79	20.86	6.57	28.61	2.31	11.72	19.1	15.12	19.56	7.25	27.58	0.6	15.24	4.09		11.56	4.21	1.86	6.72	9.54	9.09	12.63	0.67	1.62	17.09	14.49	27.94	2.26	24.14	17.64	10.65	11.16	13.61	16.73	0.73	7.24	43.43	15.38
	193.402	35.752		1.98543	1.07618			0.862529	1.33151		148	14.51	16.4	6.57	28.61	2.31	11.72	19.1	15.12	33.21	11.78	27.58	0.7	15.24	3.16		14.19	16.09	6.19	10.1	6.65	3.33	12.63	5.18	5.45	17.09	10.39	51.12	-0.63	33.05	17.64	10.65	11.16	24.8	16.73	0.73	7.24	43.43	31.62
	292.234	152.563		2.56264	1.88242			0.93609	0.246243		123	14.51	16.4	44.08	40.67	8.18	6.84	14.68	12.45	33.21	11.78	18.44	0.7	17.56	3.16		14.19	16.09	6.19	10.1	6.65	3.33	18.14	5.18	5.45	28.2	10.39	51.12	-0.63	33.05	48.97	13.67	24.12	24.8	39.09	2.63	19.67	47.32	31.62
	80.522	172.759		1.72982	1.69337			1.28309	1.03629		98	30.55	31.34	44.08	40.67	8.18	6.84	14.68	12.45	25.42	24.09	18.44	13.2	17.56	3.32	0.92	11.45	19.26	8.66	10.88	14.58	4.21	18.14	10.9	7.45	28.2	3.68	63.97	2.79	26.75	48.97	13.67	24.12	32.56	39.09	2.63	19.67	47.32	34.46
	144.654	95.244		1.98424	1.67781			1.29276	0.346886		73	30.55	31.34	62.69	40.15	18.55	9.02	11.49	18.25	25.42	24.09	10.54	13.2	9.45	3.32	1.08	11.45	19.26	8.66	10.88	14.58	4.21	17.22	10.9	7.45	27.6	3.68	63.97	2.79	26.75	44.6	9.11	28.73	32.56	39.91	4.65	21.28	33.04	34.46
	227.837	119.532		2.65865	1.96354			1.25832	-1.12333		48	34.34	52.53	62.69	40.15	18.55	9.02	11.49	18.25	22.94	20.55	10.54	22.58	9.45	4.43	1.08	5.29	7.3	8.2	10.64	14.84	7.55	17.22	9.74	3.65	27.6	3.4	46.58	1.97	20.7	44.6	9.11	28.73	29.34	39.91	4.65	21.28	33.04	23.23
	80.722	63.548		2.30493	1.62701			1.29659	-0.24103		23	34.34	52.53	41.85	30.64	9.81	5.76	9.16	17.67	22.94	20.55	13.09	22.58	4.49	4.43	14.78	5.29	7.3	8.2	10.64	14.84	7.55	16.67	9.74	3.65	32.89	3.4	46.58	1.97	20.7	60.82	12.24	31.32	29.34	23.05	3.58	26.34	21.4	23.23
	137.921	162.024		2.36148	1.90855			1.13668	-0.21526		-2	31.65	35.89	41.85	30.64	9.81	5.76	9.16	17.67	7.48	9.72	13.09	11.24	4.49	3.26	14.78	3.23	6.88	6.69	2.42	4.62	3.79	16.67	3.59	1.98	32.89	7.88	31.48	4.46	15.01	60.82	12.24	31.32	15.85	23.05	3.58	26.34	21.4	4.44
	171.022	37.657		2.4549	0.876876			0.65357	-0.64161		-27	31.65	35.89	3.93	15.88	1.13	2.66	14.88	3.21	7.48	9.72	7.12	11.24	0.44	3.26	16.98	3.23	6.88	6.69	2.42	4.62	3.79	7.59	3.59	1.98	23.5	7.88	31.48	4.46	15.01	26.34	10.01	14.61	15.85	10.81	1.2	11.8	3.45	4.44
	197.373	109.44		2.51714	2.03918			0.31146	-0.13049		-52	9.02	18.42	3.93	15.88	1.13	2.66	14.88	3.21	3.49	2.47	7.12	3.08	0.44	4.23	16.98	2.11	1.25	3.65	1.21	-0.34	1.67	7.59	0.35	-0.15	23.5	6.37	12.07	3.97	10.11	26.34	10.01	14.61	3.95	10.81	1.2	11.8	3.45	0.69
	63.306	144.319		1.50041	2.15932			-0.30262	-0.82044		-77	9.02	18.42	-0.45	5.24	1.32	1.18	-0.11	-1.65	3.49	2.47	2.74	3.08	0.34	4.23	15.2	2.11	1.25	3.65	1.21	-0.34	1.67	0.97	0.35	-0.15	3.71	6.37	12.07	3.97	10.11	2.2	1.06	2.24	3.95	3.31	0.35	6.35	0.38	0.69
	241.699	137.952		2.48018	2.23664			0.746731	0.65003		-102	3.42	1.64	-0.45	5.24	1.32	1.18	-0.11	-1.65	0.44	0.42	2.74	-0.6	0.34	0.22	15.2	0.71	0.43	-0.57	0.41	-0.18	0.79	0.97	1.05	0.75	3.71	0.45	8.13	3.73	1.29	2.2	1.06	2.24	0.82	3.31	0.35	6.35	0.38	-1.51
	226.693	86.206		2.75338	2.15739			0.651531	-0.79739		-127	3.42	1.64	-0.43	1.17	0.83	-0.02	2.46	-0.52	0.44	0.42	0.92	-0.6	0.72	0.22	4.25	0.71	0.43	-0.57	0.41	-0.18	0.79	0.03	1.05	0.75	0.46	0.45	8.13	3.73	1.29	0.07	0.18	0.46	0.82	1.38	0.4	4.11	0.22	-1.51
	216.38	125.631		2.63625	2.49704			1.03886	0.245741
	59.024	62.245		1.59494	1.09513			0.232337	0.360076
	94.78	203.628		2.07363	2.40575			0.846749	0.157264			Fmr1 KO
	253.674			2.86021				0.801271	0.175348		Vertical position (µm)	Cell #1	2	3	4	5	6	7	8	9	10	11	12	13	14	15	16	17	18	19	20	21	22
								0.446295	0.742835		248			1.94	0.66	0.47	0.28	14.21	9.54		0.38			-0.51	0.57			-1.08	16		0.26	-0.18	5.06
								0.991487	0.355991		223	0.01		1.94	11.22	1.26	0.02	14.21	4.74		3.51	0.96		1.57	0.62		0.28	10.65	16		0.26	17.46	5.06
								-0.32044			198	0.94	0.24	12.52	11.22	1.26	0.02	45.82	4.74		3.51	8.77	0.81	1.57	0.62	-0.12	1.37	10.65	23.41	0.1	5.47	17.46	14.2
								-0.5136			173	0.94	1.59	12.52	21.37	7.79	2.16	45.82	2.78		11.49	8.77	1.86	8.44	1.67	0.44	1.37	17.22	23.41	2.54	5.47	28.81	14.2
								0.70596			148	16.88	1.59	25.56	21.37	7.79	2.16	41.93	2.78	0.61	11.49	15.8	1.86	8.44	1.67	0.44	2.37	17.22	23.8	2.54	6.26	28.81	15.83
								-0.4901			123	16.88	16.08	25.56	13.37	9.58	3.03	41.93	3.32	0.76	13.92	15.8	4.44	11.28	2.98	9.55	2.37	21.73	23.8	6.1	6.26	24.51	15.83
								0.731508			98	35.44	16.08	32.28	13.37	9.58	3.03	11.14	3.32	0.76	13.92	13.38	4.44	11.28	2.98	9.55	3.25	21.73	19.51	6.1	8.29	24.51	10.64
								-0.86117			73	35.44	47.72	32.28	5.16	28.35	4.4	11.14	7.04	2.04	8.54	13.38	5.48	6.23	2.42	25.32	3.25	15.34	19.51	13.31	8.29	22.76	10.64
								0.910161			48	44.59	47.72	40.58	5.16	28.35	4.4	15.42	7.04	2.04	8.54	0.06	5.48	6.23	2.42	25.32	2.99	15.34	14.43	13.31	8.81	22.76	23.92
								1.04402			23	44.59	39.28	40.58	3.48	19.33	2.02	15.42	5.84	1.92	5.59	0.06	2.95	3.19	3.86	23.63	2.99	3.73	14.43	6.04	8.81	19.36	23.92
								0.538708			-2	38.05	39.28	48.76	3.48	19.33	2.02	16.09	5.84	1.92	5.59	0.81	2.95	3.19	3.86	23.63	2.33	3.73	2.5	6.04	5.03	19.36	31.25
								0.54138			-27	38.05	20.26	48.76	2.93	7.36	1.81	16.09	0.61	0.81	-0.36	0.81	1.25	5.29	7.7	5.61	2.33	0.58	2.5	0.61	5.03	6.23	31.25
								0.597575			-52	15.4	20.26	22.53	2.93	7.36	1.81	10.36	0.61	0.81	-0.36	-0.64	1.25	5.29	7.7	5.61	1.2	0.58	2.06	0.61	2.8	6.23	22.81
								0.777668			-77	15.4	2.71	22.53	1.03	1.06	-0.54	10.36	0.05	0.67	2.36	-0.64	0.77	1.27	7.44	-0.15	1.2	0	2.06	-0.65	2.8	1.96	22.81
								-0.60275			-102	1.19	2.71	1.67	1.03	1.06	-0.54	0.6	0.05	0.67	2.36	-0.97	0.77	1.27	7.44	-0.15	1.87	0	0.47	-0.65	0.27	1.96	17.41
								0.275755			-127	1.19	0.42	1.67	0.53	0.08	-0.78	0.6	0.54	0.63	0.23	-0.97	0.26	-0.54	6.45	0.06	1.87	0.17	0.47	0.44	0.27	-2.45	17.41
								0.951842
								0.882714
								0.185243
								1.0876
[truncated: 2 more columns]
