# Supplementary material for: Experience-dependent weakening of callosal synaptic connections in the absence of postsynaptic FMRP
Source: eLife. 2021 Oct 7;10:e71555. doi: 10.7554/eLife.71555 (PMC8526058; doi:10.7554/eLife.71555)
Supplement: Figure 2—figure supplement 2—source data 1. [file elife-71555-fig2-figsupp2-data1.xlsx]

## Sheet: Sheet1
Figure 2 - figure supplement 2 D																	Figure 2 - figure supplement 2 E
		WT																WT	Fmr1 KO
	Vertical position (µm)	Cell pair #1	2	3	4	5	6	7	8	9	10	11	12	13	14			22.582	2.958
	210.7	4.79	27.95	0.71							12.54	12.62			25.83			50.01	29.916
	185.7	14.55	23.79	1.84							34.69	8.57	48.56		29.15			17.962	11.038
	160.7	14.55	23.79	1.84	43.04	14.39				0.23	34.69	8.57	47.19	38.15	29.15			27.054	7.718
	135.7	28.66	10.59	2.83	58.74	50.6	8.62	6.81		10.39	48.54	11.69	47.19	46.52	49.81			95.616	55.638
	110.7	28.66	10.59	2.83	58.74	50.6	16.11	15.41	8.82	10.39	48.54	11.69	49.15	46.52	49.81			90.168	84.616
	85.7	36.05	15.06	7.85	64.81	104.7	16.11	15.41	18.34	17.03	63.09	26.02	49.15	52.26	86.88			80.312	16.732
	60.7	36.05	15.06	7.85	64.81	104.7	39.46	40.49	18.34	17.03	63.09	26.02	54.51	52.26	86.88			37.648	40.964
	35.7	32.47	46.91	12.07	47.21	131.8	39.46	40.49	42.78	30.55	80.2	16.88	54.51	52.86	96.66			32.122	18.314
	10.7	32.47	46.91	12.07	47.21	131.8	102.87	82.86	42.78	30.55	80.2	16.88	49.86	52.86	96.66			55.72	42.414
	-14.3	28.28	57.72	15.87	26.88	118.69	102.87	82.86	52.58	37.86	70.35	7.91	49.86	42.32	83.09			7.348	11.336
	-39.3	28.28	57.72	15.87	26.88	118.69	103.87	93.59	52.58	37.86	70.35	7.91	31.89	42.32	83.09			34.192	7.068
	-64.3	11.94	43.85	23	17.15	54.45	103.87	93.59	20.15	27.17	28.85	2.02	31.89	19.61	21.77			35.344	15.12
	-89.3	11.94	43.85	23	17.15	54.45	37.36	48.66	20.15	27.17	28.85	2.02	7.46	19.61	21.77			61.276	22.93
	-114.3	9.38	7.18	10.19	7.57	7.14	37.36	48.66	3.48	6.24	6.1	-0.03	7.46	1.9	5.44
	-139.3	9.38	7.18	10.19	7.57	7.14	2.52	12.26	3.48	6.24	6.1	-0.03	0.61	1.9	5.44
		Fmr1 KO
	Vertical position (µm)	Cell pair #1	2	3	4	5	6	7	8	9	10	11	12	13	14
	210.7	5.14	36.32	2.59							11.13	21.13			7.64
	185.7	13.23	36.78	11.92							20.31	35.1	19.3		6.06
	160.7	13.23	36.78	11.92	10.92	19.61				-0.39	20.31	35.1	21.15	15.95	6.06
	135.7	16.62	31.15	5.07	12.52	29.64	15.11	3.8		4.25	49.97	41.92	21.15	23.1	15.62
	110.7	16.62	31.15	5.07	12.52	29.64	65.77	11.99	2.03	4.25	49.97	41.92	17.97	23.1	15.62
	85.7	15.11	54.08	7.93	14.57	48.2	65.77	11.99	23.07	11.19	65.17	33.57	17.97	24.08	36.91
	60.7	15.11	54.08	7.93	14.57	48.2	121.99	19.62	23.07	11.19	65.17	33.57	8.59	24.08	36.91
	35.7	7.55	55.06	9.83	11.67	61.33	121.99	19.62	61.12	20.27	78.79	31.74	8.59	28.08	39.65
	10.7	7.55	55.06	9.83	11.67	61.33	140.94	21.16	61.12	20.27	78.79	31.74	9.25	28.08	39.65
	-14.3	3.17	32.37	11.48	9	74.62	140.94	21.16	54.81	23.45	53.5	11.33	9.25	16.37	28.81
	-39.3	3.17	32.37	11.48	9	74.62	66.01	15.4	54.81	23.45	53.5	11.33	7.11	16.37	28.81
	-64.3	0.45	14.89	11.2	4.46	33.81	66.01	15.4	17.04	12.2	13.14	1.14	7.11	7.39	8.69
	-89.3	0.45	14.89	11.2	4.46	33.81	9.18	10.54	17.04	12.2	13.14	1.14	2.62	7.39	8.69
	-114.3	0.25	1.19	1.76	2.97	5.98	9.18	10.54	2.01	-0.69	2.51	0.47	2.62	0.62	0.21
	-139.3	0.25	1.19	1.76	2.97	5.98	0.55	2.01	2.01	-0.69	2.51	0.47	1.27	0.62	0.21
