# Supplementary material for: Experience-dependent weakening of callosal synaptic connections in the absence of postsynaptic FMRP
Source: eLife. 2021 Oct 7;10:e71555. doi: 10.7554/eLife.71555 (PMC8526058; doi:10.7554/eLife.71555)
Supplement: Figure 2—source data 1. [file elife-71555-fig2-data1.xlsx]

## Sheet: Figure 2
Figure 2D							Figure 2E						Figure 2G
	P18-20			P23-30				P18-20		P23-30				P57-65
	WT	Fmr1 KO		WT	Fmr1 KO			WT	Fmr1 KO	WT	Fmr1 KO			WT	Fmr1 KO
	147.29	363.147		233.426	62.229			1.99208	2.38399	2.36815	1.79399			293.206	233.791
	343.482	92.93		710.601	496.398			2.35981	1.79207	2.85163	2.69583			95.472	263.83
	269.096	340.498		143.553	104.059			2.35073	2.45293	2.37886	2.23913			628.228	537.56
	48.402	170.908		397.767	82.523			1.38383	1.93173	2.2986	1.61555			311.237	118.34
	231.843	341.055		216.633	95.248			2.88807	3.0557	1.93779	1.58092			243.455	196.075
	123.359	591.936		583.067	202.616			2.09117	2.77228	3.16366	2.70461			459.446	128.47
	53.008	128.369		520.42	684.344			1.24722	1.63134	3.11429	3.23321			498.59	488.935
	205.482	273.211		531.219	196.551			2.53462	2.65835	2.82218	2.39039			446.483	262.454
	153.695	300.688		498.218	361.109			2.5846	2.87606	2.79433	2.65455			164.407	81.821
	152.349	302.324		417.208	209.28			2.70572	3.00335	2.62035	2.32073			374.586	314.958
	274.595	251.541		541.534	317.099			2.5356	2.49752	3.13157	2.89913			287.2	238.423
	545.289	134.502		202.986	412.788			2.65745	2.04955	2.30747	2.61573
	56.271	198.994		381.472	77.783			1.44925	1.99781	2.9794	2.28883
	322.388	244.941		416.544	177.382			2.90632	2.787	2.84151	2.47076
	399.6	182.146		569.051	276.645			2.60162	2.26042	2.977	2.66377
	223.546	279.811						2.57122	2.66871
	365.035	420.466						2.86336	2.92476
	227.493	363.833						2.57882	2.78275
	380.305	365.748						2.80198	2.78503
