# Supplementary material for: Experience-dependent weakening of callosal synaptic connections in the absence of postsynaptic FMRP
Source: eLife. 2021 Oct 7;10:e71555. doi: 10.7554/eLife.71555 (PMC8526058; doi:10.7554/eLife.71555)
Supplement: Figure 3—figure supplement 1—source data 1. [file elife-71555-fig3-figsupp1-data1.xlsx]

## Sheet: Sheet1
Figure 3 - figure supplement 1
	CV
	WT	Fmr1 KO
	0.04	0.04
	0.17	0.13
	0.21	0.36
	0.12	0.17
	0.12	0.2
	0.16	0.15
	0.16	0.09
	0.08	0.16
	0.09	0.18
	0.17	0.17
	0.15	0.27
	0.31	0.34
	0.16	0.11
	0.08	0.21
	0.24	0.18
	0.11	0.24
	0.07	0.15
	0.15	0.12
	0.34	0.3
	0.26	0.26
	0.21	0.32
	0.16	0.14
	0.13	0.09
	0.06	0.08
	0.11	0.12
	0.12	0.19
	0.18	0.09
	0.18	0.17
	0.18	0.18
	0.08	0.22
