# Supplementary material for: Experience-dependent weakening of callosal synaptic connections in the absence of postsynaptic FMRP
Source: eLife. 2021 Oct 7;10:e71555. doi: 10.7554/eLife.71555 (PMC8526058; doi:10.7554/eLife.71555)
Supplement: Figure 3—source data 1. [file elife-71555-fig3-data1.xlsx]

## Sheet: Figure 3
Figure 3B							Figure 3C
	Frequency			Amplitude				Frequency			Amplitude
	WT	Fmr1 KO		WT	Fmr1 KO			WT	Fmr1 KO		WT	Fmr1 KO
	0.895	0.474		22.357	20.121			7.877	7.596		26.093	27.941
	1.6	1.1		11.385	10.579			7.233	4.567		15.762	11.078
	1.55	1.2		12.81	12.037			7.783	7.633		12.487	18.392
	1.367	1.7		12.031	12.291			6.856	4.744		15.472	14.893
	1.105	1.105		12.137	11.379			10.474	5.386		16.583	10.856
	2.25	1.75		11.242	9.987			8.583	11.861		15.506	14.729
	1.45	1.4		13.487	9.541			12.05	5.6		17.28	13.101
	1.211	0.789		10.771	11.926			10.368	8.158		15.395	15.703
	1.3	1		8.406	9.598			6.867	6.833		11.988	12.801
	1.45	3.1		10.269	13.649			9.883	8.067		15.065	16.823
	0.95	1.15		13.794	8.829			6.55	6.517		13.3	11.073
	0.55	0.1		8.562	9.918			6.283	5.067		10.921	14.408
	1.316	1.053		10.977	9.43			7.281	5.439		13.809	11.339
Figure 3D
	WT	Fmr1 KO
	263.587	150.656
	39.783	77.518
	135.789	106.033
	60.902	54.594
	104.323	207.989
	21.683	22.822
	239.589	156.97
	71.257	88.959
	40.266	50.61
	128.135	85.063
	136.288	275.028
	255.408	159.929
	134.921	111.454
	106.065	73.109
	118.83	185.383
