# Supplementary material for: Experience-dependent weakening of callosal synaptic connections in the absence of postsynaptic FMRP
Source: eLife. 2021 Oct 7;10:e71555. doi: 10.7554/eLife.71555 (PMC8526058; doi:10.7554/eLife.71555)
Supplement: Figure 4—figure supplement 1—source data 1. [file elife-71555-fig4-figsupp1-data1.xlsx]

## Sheet: Sheet1
B1					B2
	WT	Fmr1 KO				WT	Fmr1 KO
	108.417	26.54				96.0586	80.7771
	44.8733	26.8267				49.0457	71.86
	16.7917	18.9117				37.9514	23.7357
	30.185	23.1717				32.7386	7.86714
	38.2233	19.0267				40.7829	50.5329
	18.7267	32.0533				64.4486	66.5043
	55.5067	43.6467				20.1714	30.04
	38.15	4.80167				32.1857	17.9514
	23.5817	34.1833				32.3229	44.0229
	52.1133	20.1033				23.2443	30.7743
	31.6533	72.3417				35.8943	68.9043
	23.4083	5.19				35.2114	58.91
	42.7133	27.91				27.3814	26.44
	113.158	90.3983				59.5986	28.8757
	27.5283	21.6283				53.0771	29.7386
	33.0117	31.07				33.3286	10.5671
						38.0414	65.3671
