# Supplementary material for: Experience-dependent weakening of callosal synaptic connections in the absence of postsynaptic FMRP
Source: eLife. 2021 Oct 7;10:e71555. doi: 10.7554/eLife.71555 (PMC8526058; doi:10.7554/eLife.71555)
Supplement: Figure 4—figure supplement 2—source data 1. [file elife-71555-fig4-figsupp2-data1.xlsx]

## Sheet: Figure 5 - figure supplement
No deprivation (p23-30)
	mEPSC frequency			mEPSC amplitude			Input resistance
	WT	Fmr1 KO		WT	Fmr1 KO		WT	Fmr1 KO
	0.44	0.672		18.153	16.005		101.93	142.73
	0.458	0.373		17.703	17.964		78	135.41
	0.515	0.581		18.189	16.59		83.68	96.35
	0.353	0.692		18.937	19.238		85.52	126.6
	0.561	0.441		18.639	18.108		99.2	118.01
	0.858	0.76		20.344	21.859		72.33	88.61
	0.19	0.107		15.417	14.377		94.85	128.86
	0.174	0.456		17.791	18.809		115.03	100.32
	0.306	0.307		22.41	19.633		74.15	153.09
	0.216	0.378		18.511	17.8		92.41	165.29
	0.143	0.091		16.113	15.861		108.72	118.49
	0.339	0.213		22.557	16.854		155.26	138.06
							78.38	126.12
							151.85	206.85
							72.4	145.34
Presynaptic deprivation (p23-30)
	mEPSC frequency			mEPSC amplitude			Input resistance
	WT	Fmr1 KO		WT	Fmr1 KO		WT	Fmr1 KO
	1.32	0.712		15.522	14.695		94.04	187.37
	0.676	0.538		10.147	9.374		147.96	130.64
	1.609	1.626		13.408	12.379		136.48	173.75
	0.92	0.987		20.687	16.209		108.31	148.57
	0.787	1.352		13.336	15.294		114.87	128.48
	0.782	0.731		11.771	12.837		89.27	90.55
	0.367	0.998		10.981	13.38		278.66	291.96
	0.774	0.632		11.041	10.218		123.31	158.39
	1.323	1.303		14.024	16.757		145.33	144.47
	0.93	1.526		16.7	13.519		99.46	209.86
	1.446	0.954		13.765	12.96		72.72	76.46
	0.467	1.192		18.601	14.991		174.63	182.33
	0.899	1.366		14.106	13.259		130.18	171.96
							184.24	129.66
							158.72	198.73
							116.01	137.64
Postsynaptic deprivation (p23-30)
	mEPSC frequency			mEPSC amplitude			Input resistance
	WT	Fmr1 KO		WT	Fmr1 KO		WT	Fmr1 KO
	1.202	1.943		10.413	11.487		174.64	214.09
	1.787	1.137		10.888	11.97		137.73	129.04
	0.909	1.488		12.81	14.21		105.53	152
	1.323	1.578		11.646	18.269		115.15	207.66
	1.332	0.984		12.202	11.312		133.97	108.84
	0.872	0.899		12.837	16.804		75.33	121.08
	1.28	1.742		14.779	16.164		154.04	125.51
	0.828	1.039		14.68	16.332		93.87	137.7
	0.46	1.2		10.323	12.596		110.2	80.66
	0.41	0.517		10.331	12.454		105.65	126.33
	0.421	0.888		13.156	14.315		159.4	164.21
	0.352	0.438		13.954	12.608		134.19	169.67
	0.571	0.839		11.443	13.591		79.35	108.45
	0.418	0.482		13.237	12.527		97.42	108.84
	0.804	0.979		14.47	15.564		134.31	179.62
							117.68	155.08
							155.51	178.03
