# Supplementary material for: Experience-dependent weakening of callosal synaptic connections in the absence of postsynaptic FMRP
Source: eLife. 2021 Oct 7;10:e71555. doi: 10.7554/eLife.71555 (PMC8526058; doi:10.7554/eLife.71555)
Supplement: Figure 4—source data 1. [file elife-71555-fig4-data1.xlsx]

## Sheet: Figure 5
Figure 5B1					Figure 5B2					Figure 5C
	WT	Fmr1 KO				WT	Fmr1 KO				Presynaptic dep			Postsynaptic dep
	647.568	164.302				686.626	477.76				WT	Fmr1 KO		WT	Fmr1 KO
	449.692	296.584				303.484	330.862				3.11232	2.51667		3.23466	3.07715
	434.848	512.069				471.868	392.405				2.80782	2.62705		3.00502	3.04253
	452.985	277.959				569.138	151.319				2.46225	2.53324		2.97485	2.89477
	483.504	220.811				321.458	349.021				2.47999	2.26789		2.67604	2.10071
	517.059	534.785				178.451	298.072				2.60522	2.26484		2.80815	2.84388
	535.469	406.172				300.745	488.487				2.63436	2.649		2.95049	3.17329
	479.695	120.294				587.181	496.709				3.25161	3.13159		2.6331	2.84375
	459.195	412.947				304.177	580.265				2.77787	2.17715		3.0698	2.99713
	474.373	205.018				398.193	479.3				2.88385	2.83774		2.70498	2.98548
	329.825	571.458				284.703	507.772				2.97715	2.61282		2.90112	2.98164
	423.736	229.896				339.777	492.945				2.74013	2.97883		2.85233	3.10361
	607.853	484.083				430.99	515.394				2.48097	2.2154		3.05407	3.21568
	708.893	679.096				687.492	380.456				3.08483	2.98595		2.9355	3.01317
	494.565	482.964				541.889	507.134				3.24852	3.22987		3.05912	2.80215
	653.505	418.335				503.821	256.212				2.84912	2.83882		3.03494	3.00615
						372.095	653.818				3.0371	2.84337		2.58833	2.29466
														2.96859	3.2134
