# Supplementary material for: Experience-dependent weakening of callosal synaptic connections in the absence of postsynaptic FMRP
Source: eLife. 2021 Oct 7;10:e71555. doi: 10.7554/eLife.71555 (PMC8526058; doi:10.7554/eLife.71555)
Supplement: Figure 5—source data 1. [file elife-71555-fig5-data1.xlsx]

## Sheet: Figure 4
Figure 4B					Figure 4D
	WT	Fmr1 KO				WT	Fmr1 KO
	102.682	15.57				15.9767	10.4127
	50.196	28.41				15.8646	10.5992
	12.9817	24.7883				57.9642	41.18
	4.554	5.84				47.8062	32.8785
	61.8767	18.38				95.5577	20.8477
	151.457	72.4				35.24	41.2692
	40.305	32.8917				15.3238	22.6638
	91.14	29.0433				38.0967	53.155
	57.66	57.76				74.08	31.3815
	18.52	38.4433				119.01	56.29
	80.6867	58.4083				39.2108	24.3108
						36.2131	23.9862
