# Supplementary material for: Experience-dependent weakening of callosal synaptic connections in the absence of postsynaptic FMRP
Source: eLife. 2021 Oct 7;10:e71555. doi: 10.7554/eLife.71555 (PMC8526058; doi:10.7554/eLife.71555)
Supplement: Figure 6—figure supplement 1—source data 1. [file elife-71555-fig6-figsupp1-data1.xlsx]

## Sheet: Figure 6 - figure supplement
A				B				C
	WT	Fmr1 KO			WT	Fmr1 KO			L4H input			L4A input
	28.3625	23.4275			11.42	10.55			WT	Fmr1 KO		WT	Fmr1 KO
	46.93	47.28			23.59	20.97			0.6545	0.272313		0.7083	0.249438
	18.7275	28.0625			6.59	16.73			0.49125	0.769		0.419083	0.4291
	48.9725	44.7575			26.67	19.86			0.34725	0.674542		0.664813	0.322042
	27.0287	48.1962			31.16	15.98			0.829	0.245438		0.6277	0.182438
	26.185	36.3925			20.13	12.19			0.5635	0.409		0.349333	0.150929
	12.6725	13.28			15.8	23.9			0.68345	0.237857		0.1832	0.162429
	20.295	14.1025			17.63	20.24			0.544	0.495571		0.35875	0.297143
					19.4	24.07			0.527143	0.42975		0.242	0.244
					14.24	18.42			0.712792	0.373833		0.604	0.35725
					13.18	11.18			0.248286	0.187		0.220857	0.118821
									0.348917	0.30575		0.2625	0.1395
									1.52175	0.267344		0.64175	0.321
									0.168714	0.214938		0.152643	0.310563
									0.319214	0.381179		0.175929	0.176571
									0.181357	0.3915		0.181786	0.257417
										0.279571			0.246714
										0.363344			0.203656
										0.113333			0.091111
										0.219167			0.1455
										0.1455			0.067438
