# Supplementary material for: Experience-dependent weakening of callosal synaptic connections in the absence of postsynaptic FMRP
Source: eLife. 2021 Oct 7;10:e71555. doi: 10.7554/eLife.71555 (PMC8526058; doi:10.7554/eLife.71555)
Supplement: Figure 6—source data 1. [file elife-71555-fig6-data1.xlsx]

## Sheet: Figure 6
Figure 6E
	L4 Home			L4 adjacent			L2/3			L5A
	WT	Fmr1 KO		WT	Fmr1 KO		WT	Fmr1 KO		WT	Fmr1 KO
	6.0025	10.5587		3.46625	4.95437		3.595	5.7035		2.76333	1.62467
	4.77	10.3575		2.9975	7.05125		4.265	3.044		3.88467	7.91533
	15.2325	12.065		4.6625	4.49125		1.781	1.624		4.79667	7.886
	15.3225	17.565		4.8125	7.49875		2.046	3.062		1.15667	1.58667
	19.7425	7.15		8.55875	3.415		2.135	2.624		1.95533	0.959333
	15.0025	12.1725		5.60125	5.07875		3.691	5.975		3.70067	2.04
	12.6487	11.9887		5.87312	3.9775		2.7145	3.6705		1.82333	3.20867
	8.8775	5.4075		3.57375	2.69125		4.114	2.854		3.856	1.016
	10.985	14.525		4.8325	11.9925		2.594	3.41		3.95333	3.57467
	22.2387	31.5975		10.925	13.2331		4.302	5.8095		6.32667	3.43867
	8.26	11.165		4.97938	3.50062		4.244	3.6305		1.41867	1.39467
	25.6075	26.3475		7.685	5.08875		2.533	2.748		1.60467	1.15733
	15.6543	12.5113		7.33563	10.7069		3.311	2.9245		1.79933	2.34067
	9.53625	11.3038		4.38	5.13625		3.193	4.075		3.32667	3.35067
	23.4325	8.73		7.67875	3.59625		6.697	1.397		2.05533	0.284
	20.0525	21.1375		3.6425	5.73		4.263	2.974		5.422	3.48267
	13.6925	11.0275		5.74125	5.33		3.74	4.119		5.87667	5.24333
